# Supplementary material
Source: ML conference proceedings conference paper supplement (https://openaccess.thecvf.com/content/WACV2024/html/Spetlik_Single-Image_Deblurring_Trajectory_WACV_2024_paper.html)
Supplement: Supplementary file 1 [file Spetlik_Single-Image_Deblurring_Trajectory_WACV_2024_supplemental.zip]

Archive with 6 entries (6 files):
- ball2.mp4
- marker.mp4
- key.mp4
- box.mp4
- battery.mp4
- Supplementary.pdf
